# Supplementary material
Source: Research Square preprint supplement (doi:10.21203/rs.3.rs-9561149/v1)
Supplement: Supplementary file 1 [file 5cb8cee4ca0130eb3a93e6d2.docx]

Table 4: The variability in function of panels in 16 MLVA (VNTR) assay

**Panel 1 groups eight minisatellites (MLVA 8) Panel 2A group 3 & Panel 2B group 5 microsatellites**

*
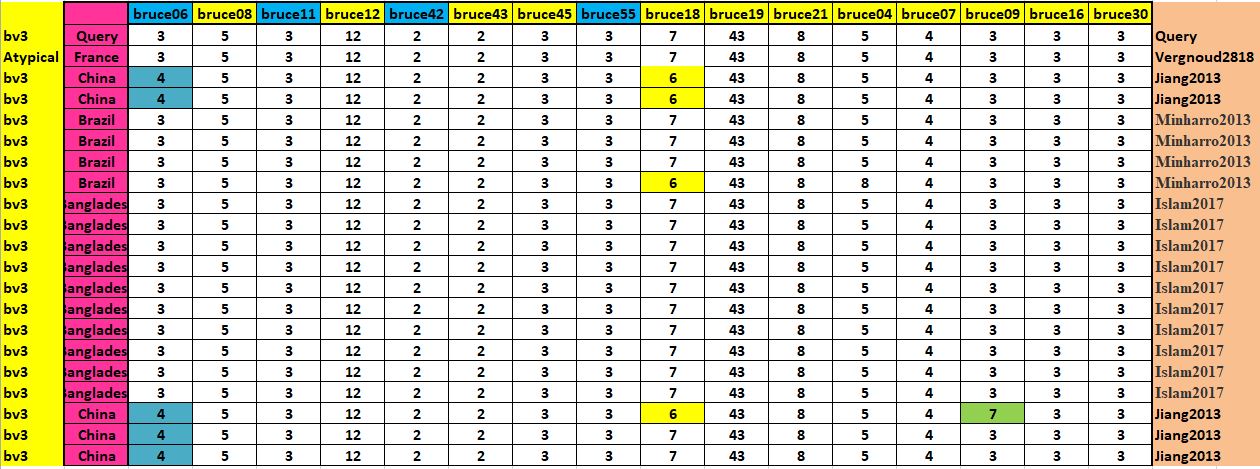
*

Table.5: MLVA-16 profiles of *B. abortus* biovar 3 isolates from Bangladesh compared with international **strains.
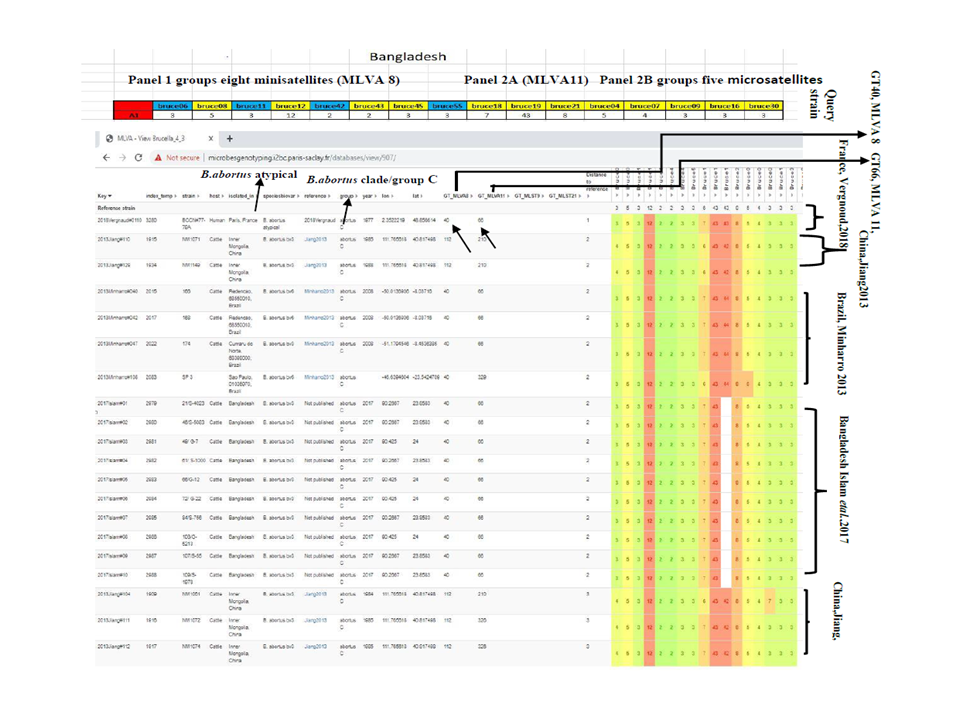
**
